# Supplementary material for: Comparative analysis of IDF, ATPIII and CDS in the diagnosis of metabolic syndrome among adult inhabitants in Jiangxi Province, China
Source: PLoS One. 2017 Dec 7;12(12):e0189046. doi: 10.1371/journal.pone.0189046 (PMC5720703; doi:10.1371/journal.pone.0189046)
Supplement: S5 Table — (DOCX) [file pone.0189046.s005.docx]

**Table 5. Consistencies in the diagnoses of MS according to the three criteria.**

| Indexes | Total | | Male | | Female | |
| --- | --- | --- | --- | --- | --- | --- |
| N | Consistency rate (%) | N | Consistency rate (%) | N | Consistency rate (%) |
| IDF(+)ATPⅢ (+) / IDF(-)ATPⅢ (-) | 5614 | 94.21 | 2269 | 92.57 | 3345 | 95.35 |
| IDF(+)ATPⅢ (-) | 1 | 0 | 1 |
| IDF(-)ATPⅢ(+) | 344 | 182 | 162 |
| Kappa value |  | 0.85* |  | 0.77* |  | 0.89* |
| IDF(+) CDS(+) / IDF(-) CDS(-) | 5036 | 84.51 | 2169 | 88.49 | 2867 | 81.73 |
| IDF(+) CDS(-) | 776 | 187 | 589 |
| IDF(-) CDS(+) | 147 | 95 | 52 |
| Kappa value |  | 0.46* |  | 0.55* |  | 0.42* |
| ATPⅢ (+)CDS(+) / ATPⅢ (-) CDS(-) | 4889 | 82.04 | 2113 | 86.21 | 2776 | 79.13 |
| ATPⅢ (+) CDS(-) | 1021 | 306 | 715 |
| ATPⅢ (-) CDS(+) | 49 | 32 | 17 |
| Kappa value |  | 0.46* |  | 0.56* |  | 0.40* |

**P*<0.05
